# Supplementary material
Source: PubMed Central journal article supplement (PMC4146755)
Supplement: NIHMS608424-supplement-ONLINE_SUPPLEMENT_Online_Supplement_tables_.pdf [file NIHMS608424-supplement-ONLINE_SUPPLEMENT_Online_Supplement_tables_.pdf]

ONLINE SUPPLEMENT:

Online Supplement tables:

Table I: Prevalence of posterior circulation intracranial atherosclerosis in diabetics vs. non diabetics at study entry:

|                                                    | DM + (n=248) | DM- (n=255) |
|----------------------------------------------------|--------------|-------------|
| Posterior Intracranial stenosis*<br>>50% + (n=307) | 155 (63%)    | 152 (60%)   |
| Posterior Intracranial stenosis<br>>50% - (n=196)  | 93 (38%)     | 103 (40%)   |

P-value=0.50: there is no difference in the proportion with posterior circulation intracranial arterial stenosis >50% between those with and without diabetes at baseline.

\*Posterior circulation includes the basilar, posterior cerebral and intracranial vertebral arteries.

Table II: Rate of recurrent stroke in diabetics vs. non diabetics according to topography of intracranial stenosis

|                                       | Rate of recurrent stroke |
|---------------------------------------|--------------------------|
| All participants                      |                          |
| Anterior circulation*                 |                          |
| (+) intracranial stenosis<br>(n=83)   | 3.0 (1.4, 5.1)           |
| (-) intracranial stenosis<br>(n=1269) | 2.5 (2.0, 2.9)           |
| Posterior circulation†                |                          |
| (+) intracranial stenosis<br>(n=31)   | 3.8 (1.2, 7.7)           |
| (-) intracranial stenosis<br>(n=702)  | 2.6 (2.0, 3.2)           |
| p-value for interaction               | 0.88                     |
| Diabetic participants                 |                          |
| Anterior circulation                  |                          |
| (+) intracranial stenosis<br>(n=36)   | 5.0 (2.0, 9.3)           |
| (-) intracranial stenosis<br>(n=393)  | 3.2 (2.3, 4.2)           |
| Posterior circulation                 |                          |
| (+) intracranial stenosis<br>(n=17)   | 7.4 (2.4, 15.1)          |
| (-) intracranial stenosis<br>(n=316)  | 3.5 (2.5, 4.7)           |
| p-value for interaction               | 0.72                     |

\*Anterior circulation includes intracranial carotid and middle cerebral/anterior cerebral arteries.

†Posterior cerebral includes basilar, posterior cerebral and intracranial vertebral arteries.
